# Supplementary material for: Efficacy of benralizumab for patients with severe eosinophilic asthma: a retrospective, real-life study
Source: BMC Pulm Med. 2020 Aug 3;20:207. doi: 10.1186/s12890-020-01248-x (PMC7398222; doi:10.1186/s12890-020-01248-x)
Supplement: Supplementary file 1 — Additional file 1. Characteristics of 12 patients who received other biologics before benralizumab treatment [file 12890_2020_1248_MOESM1_ESM.xlsx]

## Sheet: Sheet1
Additional Table 1: characteristics of 12 patients who received other biologics before benralizumab treatment
case	pattern	sex	disease duration (years)	BMI (kg/m2)	comorbidities	duration of OMA (months)	GETE of OMA	duration of MEP (months)	GETE of MEP	reason of switching‡	GETE of BEN	serum IgE before first biologic	EOS before OMA(/µl)	EOS before MEP (/µl)	EOS before BEN (/µl)	ACT before MEP	ACT before BEN	ACT after BEN	number of exacerbations before MEP (/year)	number of exacerbations before BEN (/year)	number of exacerbations after BEN (/year)¶	change in FEV1 after switching (ml)
1	OMA(-DUP)†	M	9	29.3	AD	3	moderate	―	―	symptoms	moderate	557	806	ー	1350	ー	9	14	－	－	6	－
2	OMA-MEP	F	19	18.9	ECRS, EOM, EGPA	11	poor	24	good	discussion	good	503	483	1112	234	16	20	21	4	1	2.6	-50
3	OMA-MEP	F	29	18	ECRS, EOM	88	moderate	13	good	discussion	good	138	533	654	106	16	23	24	2	2	1.7	340
4	OMA-MEP	M	30	29.3	ECRS, EOM, EGPA	20	moderate	35	good	visit interval	moderate	248	583	426	38	16	19	21	12	7	9	230
5	OMA-MEP	M	10	27.7	ECRS	4	poor	5	moderate	visit interval	poor	67	397	435	111	16	18	16	4	4	0	-180
6	MEP	M	36	24.3	ECRS, EOM	ー	ー	17	good	symptoms	good	82	ー	575	78	18	23	24	7	0	0	-40
7	MEP	F	26	17	ECRS, EOM	ー	ー	24	moderate	visit interval	moderate	31	ー	758	50	21	23	22	5	0	4.3	-30
8	MEP	F	12	19	ECRS, EOM	ー	ー	24	good	visit interval	good	134	ー	544	284	13	21	25	3	0	0	360
9	MEP	F	21	20.1	AERD, ECRS	ー	ー	6	good	discussion	worsening	40	ー	390	32	18	22	18	2	1	4	-250
10	MEP	F	36	24.7	ECRS	ー	ー	21	good	symptoms	good	528	ー	487	20	21	20	22	4	3	0	-50
11	MEP	M	8	22.1	ー	ー	ー	22	good	visit interval	good	88	ー	289	69	10	20	20	1	0	0	20
12	MEP	M	9	20	ECRS, EGPA	ー	ー	12	moderate	visit interval	moderate	1247	ー	697	21	ー	ー	19	－	－	0.7	30
abbreviations: ACT; Asthma Control Test, AD; atopic dermatitis, AERD; aspirin-exacerbated respiratory disease, BEN; benralizumab, BMI; body mass index, DUP; dupilumab, ECRS; eosinophilic chronic rhinosinusitis, EGPA; eosinophilic granulomatosis with polyangiitis
EOM; eosinophilic otitis media, EOS; peripheral blood eosinophil count, FEV1; forced expiratory volume in one second, GETE; global evaluation of treatment effectiveness, OMA; omalizumab, MEP; mepolizumab
†Case 1 received dupilumab for atopic dermatitis before the introduction of benralizumab.
‡By "visit interval" is meant that the patient wanted to visit the hospital every eight weeks (benralizumab) compared to every four weeks (mepolizumab).
¶The number of annual exacerbations after benralizumab treatment was defined as the total number of exacerbations x 12/the total duration of the observation period (months).
