# Supplementary material for: Efficacy of benralizumab for patients with severe eosinophilic asthma: a retrospective, real-life study
Source: BMC Pulm Med. 2020 Aug 3;20:207. doi: 10.1186/s12890-020-01248-x (PMC7398222; doi:10.1186/s12890-020-01248-x)
Supplement: Supplementary file 2 — Additional file 2. Patients characteristics at baseline in four subgroup [male, female, AERD (−) and (+)] [file 12890_2020_1248_MOESM2_ESM.xlsx]

## Sheet: addTable 2
additional Table 2 : Patients characteristics at baseline in four subgroup [male, female, AERD (-) and (+)]
	male (n=9)	female (n=15)	p value	AERD (-) (n=17)	AERD (+) (n=7)	p value
male, n (%)	9 (100)	0 (0)	―	6 (35)	3 (43)	> 0.99
age (years)	56.4 (16.0)	58.1 (12.2)	0.93	59.8 (10.6)	51.7 (18.2)	0.37
BMI (kg/m2)	26.1 (3.9)	21.7 (4.5)	0.022	22.5 (4.6)	25.4 (4.8)	0.15
smoking (never/former), n	5 / 4	13 / 2	0.15	12 / 5	6 / 1	0.63
peripheral blood eosinophil counts (/µl)	331 (432)	268 (226)	0.88	233 (211)	434 (470)	0.43
peripheral blood basophil counts (/µl)	34 (28)	36 (28)	0.77	31 (26)	44 (32)	0.31
serum IgE (IU/ml)	360 (237)	156 (123)	0.022†	216 (187)	272 (231)	0.66
FeNO (ppb)	53 (32)	62 (42)	0.65	58 (33)	61 (53)	0.87
%FVC (%)	86.6 (11.2)	99.8 (14.9)	0.046	98.0 (15.0)	87.3 (12.5)	0.11
%FEV1 (%)	64.1 (12.7)	87.0 (22.1)	0.008†	83.7 (21.6)	65.4 (17.9)	0.028
FEV1/FVC (%)	61.8 (9.0)	70.3 (10.8)	0.079	69.2 (9.6)	62.2 (12.9)	0.32
FEV1 (ml)	2091 (502)	1909 (652)	0.2	2051 (597)	1800 (597)	0.052
%PEF (%)	67.1 (13.5)	93.9 (24.9)	0.008†	88.9 (26.6)	71.6 (14.9)	0.19
ACT (pts)	15.8 (5.4)	21.0 (3.3)	0.012†	21.2 (2.3)	14.7 (5.8)	0.012†
MEPO (+), n (%)	5 (56)	6 (40)	0.68	10 (59)	1 (14)	0.078
ECRS (+), n (%)	7 (78)	13 (87)	0.61	15 (88)	5 (71)	0.55
number of annual exacerbations	5.1 (4.2)	1.6 (2.3)	0.051	1.9 (3.3)	4.9 (2.9)	0.012
maintenance therapy of OCS, n (%)	2 (22)	6 (40)	0.66	5 (29)	3 (43)	0.65
prednisolone equivalent dose (mg/day)	10.5 (6.4) (n=2)	4.0 (2.0) (n=6)	0.09	4.8 (1.6) (n=5)	7.0 (7.2) (n=3)	> 0.99
Data at baseline are presented as n (%) or the mean (standard deviation), unless otherwise stated.
Data were analyzed using Fisher's exact test or Mann-Whitney U test.
†P values with sufficient power that were re-evaluated by a post-hoc power analysis.
Abbreviations: AERD; aspirin-exacerbated respiratory disease, BMI; body mass index, FeNO; fractional exhaled nitric oxide, ppb; parts-per-billion
FVC; forced vital capacity, FEV1; forced expiratory volume in one second, PEF; peak expiratory flow, ACT; Asthma Control Test
MEPO; previous mepolizumab treatment, ECRS; eosinophilic chronic rhinosinusitis, OCS; oral corticosteroids
